# Supplementary material
Source: MDPI journal article supplement (https://www.mdpi.com/2312-7481/9/3/62)
Supplement: s1 [file s1]

# A Dy<sup>III</sup> complex of a pentadentate Schiff base with field-induced single-ion magnet behavior

Julio Corredoira-Vázquez<sup>1,2,\*</sup>, Paula Oreiro-Martínez<sup>1</sup>, Ana M. García-Deibe<sup>1</sup>, Jesús Sanmartín-Matalobos<sup>1,3</sup>, Matilde Fondo<sup>1,\*</sup>

<sup>1</sup> Departamento de Química Inorgánica, Facultade de Química, Universidade de Santiago de Compostela, Campus Vida, 15782 Santiago de Compostela, Spain

<sup>2</sup> Phantom-g, CICECO – Aveiro Institute of Materials, Department of Physics, University of Aveiro, 3810-193 – Aveiro, Portugal

<sup>3</sup> Institute of Materials (iMATUS), Universidade de Santiago de Compostela, 15782 Santiago de Compostela, Spain

\* Correspondence: julio.corredoira.vazquez@usc.es (J.C.-V.); matilde.fondo@usc.es (M.F.)

|                                                                                                                                                                                                                                         |    |
|-----------------------------------------------------------------------------------------------------------------------------------------------------------------------------------------------------------------------------------------|----|
| <b>Table S1.</b> Main bond distances (Å) and angles (°) for <b>1</b> .                                                                                                                                                                  | S2 |
| <b>Table S2.</b> SHAPE v2.1. Continuous Shape Measures Calculation (c) 2013 Electronic Structure Group, Universitat de Barcelona.                                                                                                       | S2 |
| <b>Table S3.</b> Generalised Debye model fitting parameters for <b>1</b> .                                                                                                                                                              | S3 |
| <b>Table S4.</b> Comparison of some structural and magnetic parameters for Dy <sup>III</sup> complexes magneto-structurally characterised with the ligand H <sub>2</sub> L.                                                             | S3 |
| <b>Table S5.</b> Crystal data and structure refinement for <b>1</b> .                                                                                                                                                                   | S4 |
| <b>Figure S1.</b> IR spectrum for <b>1</b> in the 4000-500 cm <sup>-1</sup> region.                                                                                                                                                     | S4 |
| <b>Figure S2.</b> Comparative powder X-ray diffractograms for <b>1</b> . Blue: experimental diffractogram for the microcrystalline sample; red: calculated diffractogram using the data obtained from single X ray diffraction studies. | S5 |
| <b>Figure S3.</b> Left) Dependence of $\chi'_M$ on temperature for <b>1</b> at a frequency of 8000 Hz. Right) Dependence of $\chi''_M$ on temperature for <b>1</b> at a frequency of 8000 Hz.                                           | S5 |
| <b>Figure S4.</b> Left) Dependence of $\chi''_M$ on frequency for <b>1</b> at 5 K under various external applied fields. Right) Dependence of the magnetic relaxation time on field at 5 K for <b>1</b> .                               | S5 |
| <b>Figure S5.</b> Dependence of $\chi'_M$ on frequency for <b>1</b> under H <sub>dc</sub> = 1500 Oe between 4.5 and 8 K                                                                                                                 | S6 |
| <b>Figure S6.</b> Cole-Cole plot for complex <b>1</b> under an external field H <sub>dc</sub> = 1500 Oe.                                                                                                                                | S6 |

**Table S1.** Main bond distances (Å) and angles (°) for **1**.

|             |            |
|-------------|------------|
| Dy1-O1      | 2.3390(14) |
| Dy1-O2      | 2.2394(14) |
| Dy1-N2      | 2.4983(17) |
| Dy1-N1      | 2.4915(18) |
| Dy1-N3      | 2.5299(17) |
| Dy-O1W      | 2.3954(15) |
| Dy-O2W      | 2.3816(16) |
| Dy1-Cl      | 2.7768(6)  |
| O2-Dy1-N1   | 163.51(5)  |
| N12-Dy1-N13 | 63.69(6)   |

**Table S2.** SHAPE v2.1. Continuous Shape Measures Calculation (c) 2013 Electronic Structure Group, Universitat de Barcelona.**Geometries with coordination number 8**

|          |        |                                            |
|----------|--------|--------------------------------------------|
| ETBPY-8  | 13 D3h | Elongated trigonal bipyramid               |
| TT-8     | 12Td   | Triakistetrahedron                         |
| JSD-8    | 11 D2d | Snubdiphenoid J84                          |
| BTPR-8   | 10 C2v | Biaugmented trigonal prism                 |
| JBTPR-8  | 9 C2v  | Biaugment trigonal prism J50               |
| JETBPY-8 | 8 D3h  | Johnson elongated triangular bipyramid J14 |
| JGBF-8   | 7 D2d  | Johnson gyrobifastigium J26                |
| TDD-8    | 6 D2d  | Triangular dodecahedron                    |
| SAPR-8   | 5 D4d  | Square antiprism                           |
| CU-8     | 4 Oh   | Cube                                       |
| HBPY-8   | 3 D6h  | Hexagonal bipyramid                        |
| HPY-8    | 2 C7v  | Heptagonal pyramid                         |
| OP-8     | 1 D8h  | Octagon                                    |

**1**

|                 |              |               |        |               |         |         |
|-----------------|--------------|---------------|--------|---------------|---------|---------|
| Structure [ML8] | ETBPY-8      | TT-8          | JSD-8  | <b>BTPR-8</b> | JBTPR-8 | JETBPY8 |
|                 | 21.133,      | 13.835,       | 3.985, | <b>2.511,</b> | 3.351,  | 25.134, |
| JGBF-8          | <b>TDD-8</b> | SARP-8        | CU-8   | HBPY-8        | HPY-8   | OP-8    |
|                 | 11.063,      | <b>2.138,</b> | 4.482, | 13.274,       | 14.271, | 23.383, |
|                 |              |               |        |               |         | 31.8    |

**Table S3.** Generalised Debye model fitting parameters for **1**.

| <i>T</i> /K | $\chi_s/(\text{cm}^3\text{mol}^{-1})$ | $\chi_T/(\text{cm}^3\text{mol}^{-1})$ | $\tau/(10^{-4}\text{s})$ | $\alpha$ |
|-------------|---------------------------------------|---------------------------------------|--------------------------|----------|
| 4.5         | 0.639                                 | 3.15                                  | 12.63                    | 0.22     |
| 5.0         | 0.514                                 | 2.89                                  | 6.58                     | 0.24     |
| 5.5         | 0.480                                 | 2.60                                  | 3.66                     | 0.17     |
| 6.0         | 0.120                                 | 2.38                                  | 2.13                     | 0.12     |
| 6.5         | 0.440                                 | 2.22                                  | 1.25                     | 0.09     |
| 7.0         | 0.410                                 | 2.09                                  | 0.69                     | 0.08     |
| 7.5         | 0.371                                 | 1.97                                  | 0.38                     | 0.09     |
| 8.0         | 0.297                                 | 1.87                                  | 0.19                     | 0.12     |

**Table S4.** Comparison of some structural and magnetic parameters for Dy<sup>III</sup> complexes magneto-structurally characterised with the ligand H<sub>2</sub>L.

| Compound*                                                                                      | d(Dy-O) (Å) <sup>a</sup>  | d(Dy-N) (Å) <sup>a</sup>  | c.n./<br>geometry <sup>b</sup> | <i>U</i> <sub>eff</sub> K/ <i>H</i> <sub>dc</sub> (Oe) | Ref          |
|------------------------------------------------------------------------------------------------|---------------------------|---------------------------|--------------------------------|--------------------------------------------------------|--------------|
| [Dy(HL)(NO <sub>3</sub> ) <sub>2</sub> ]                                                       | 2.2391(16),<br>2.3663(16) | 2.4713(19)-<br>2.4971(19) | 9 / TCTPR                      | No SIM                                                 | 14           |
| [Dy(L)(NO <sub>3</sub> )(EtOH)(H <sub>2</sub> O)]                                              | 2.2689(17),<br>2.2869(17) | 2.503(2)-<br>2.538(2)     | 9 / CSAPR                      | 46.1/1500                                              | 14           |
| [Dy(HL') <sub>2</sub> ][Dy(L)(Cl <sub>2</sub> )]                                               | 2.286(9)                  | 2.480(15)-<br>2.506(10)   | 7 / PBPY                       | 31/ 3000                                               | 14           |
| (Et <sub>3</sub> NH)[Dy <sub>0.09</sub> Y <sub>0.91</sub> (L)(NO <sub>3</sub> ) <sub>2</sub> ] | 2.226(13),<br>2.322(13)   | 2.418(13)-<br>2.554(13)   | 9 / TCTPR                      | 49.1/0                                                 | 14           |
| [Dy(L)Cl(H <sub>2</sub> O) <sub>2</sub> ]                                                      | 2.3390(14),<br>2.3394(14) | 2.4915(18)-<br>2.5299(17) | 8 / TDD                        | 113.5/1500                                             | This<br>work |

\* solvates are omitted; H<sub>2</sub>L': (6-(2-hydroxyphenyliminomethyl)-2-methoxyhydroxymethyl)pyridine); <sup>a</sup> distances with the N and O atoms of the N<sub>2</sub>O<sub>3</sub> ligand; <sup>b</sup> TCTPR: spherical tricapped trigonal prism; CSAPR: spherical capped square antiprism; PBPY: pentagonal bipyramid; TDD: triangular dodecahedron

**Table S5.** Crystal data and structure refinement for **1**.

|                                                     |                                                                   |
|-----------------------------------------------------|-------------------------------------------------------------------|
| Empirical formula                                   | C <sub>19</sub> H <sub>17</sub> ClDyN <sub>3</sub> O <sub>4</sub> |
| Molecular weight                                    | 549.30                                                            |
| Crystal system                                      | Triclinic                                                         |
| Space group                                         | <i>P</i> -1                                                       |
| Wavelength (Å)                                      | 0.71073                                                           |
| Crystal size (mm <sup>3</sup> )                     | 0.119 × 0.088 × 0.036                                             |
| Colour, shape                                       | Red, plate                                                        |
| <i>T</i> (K)                                        | 100                                                               |
| <i>a</i> (Å)                                        | 6.6759(11)                                                        |
| <i>b</i> (Å)                                        | 11.6406(17)                                                       |
| <i>c</i> (Å)                                        | 12.586(2)                                                         |
| $\alpha$ (°)                                        | 71.803(5)                                                         |
| $\beta$ (°)                                         | 82.849(6)                                                         |
| $\gamma$ (°)                                        | 81.180(5)                                                         |
| Volume (Å <sup>3</sup> )                            | 915.1(3)                                                          |
| <i>Z</i>                                            | 2                                                                 |
| Absorpt. coef. (mm <sup>-1</sup> )                  | 4.621                                                             |
| Reflections collected                               | 41987                                                             |
| Independent reflections                             | 4529 [ <i>R</i> <sub>int</sub> = 0.0344]                          |
| Data / restraints / param.                          | 4529 / 0 / 269                                                    |
| Final <i>R</i> indices [ <i>I</i> > 2σ( <i>I</i> )] | <i>R</i> <sub>1</sub> = 0.0157; <i>wR</i> <sub>2</sub> = 0.0345   |
| <i>R</i> indices (all data)                         | <i>R</i> <sub>1</sub> = 0.0176; <i>wR</i> <sub>2</sub> = 0.0353   |

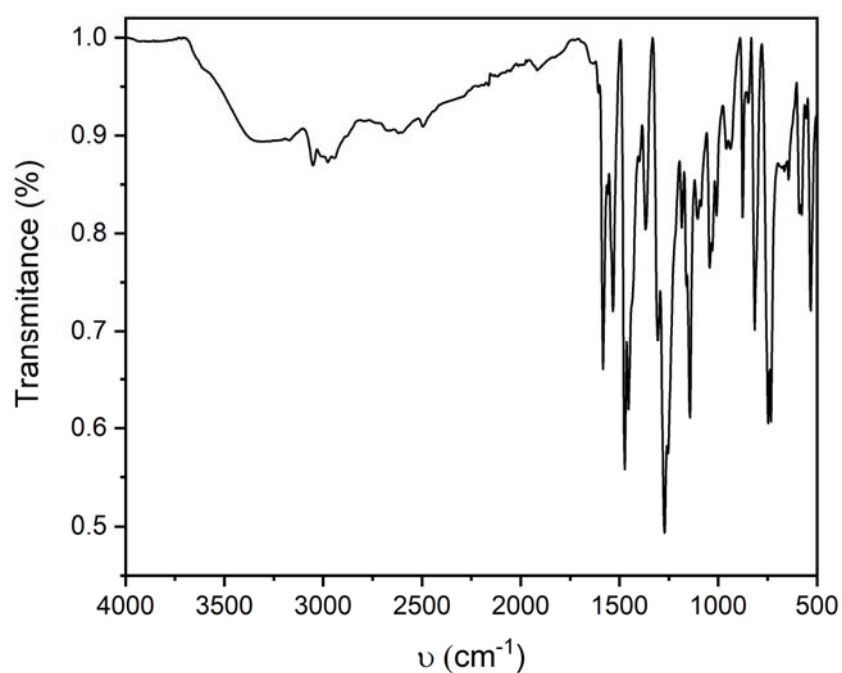**Figure S1.** IR spectrum for **1** in the 4000-500 cm<sup>-1</sup> region.

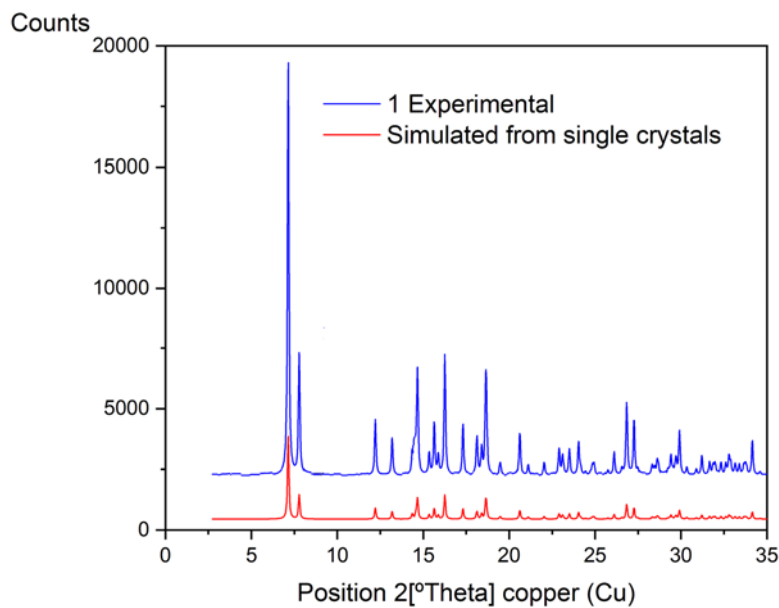

**Figure S2.** Comparative powder X-ray diffractograms for **1**. Blue: experimental diffractogram for the microcrystalline sample; red: calculated diffractogram using the data obtained from single X ray diffraction studies.

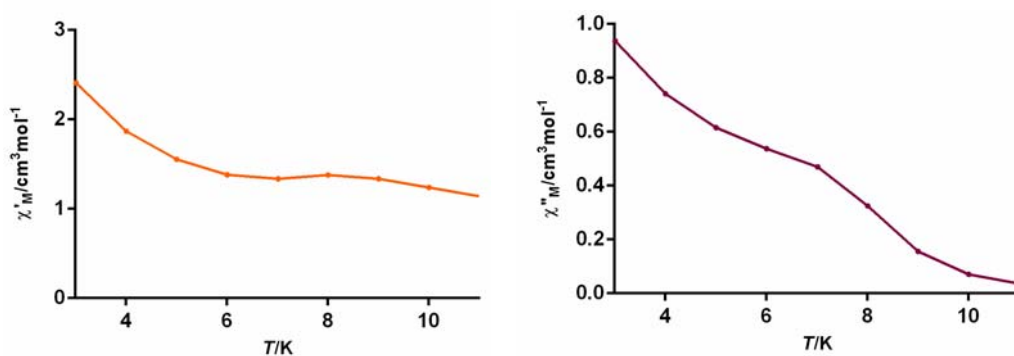

**Figure S3.** Left) Dependence of  $\chi'_M$  on temperature for **1** at a frequency of 8000 Hz at  $H_{dc} = 0$ . Right) Dependence of  $\chi''_M$  on temperature for **1** at a frequency of 8000 Hz at  $H_{dc} = 0$ .

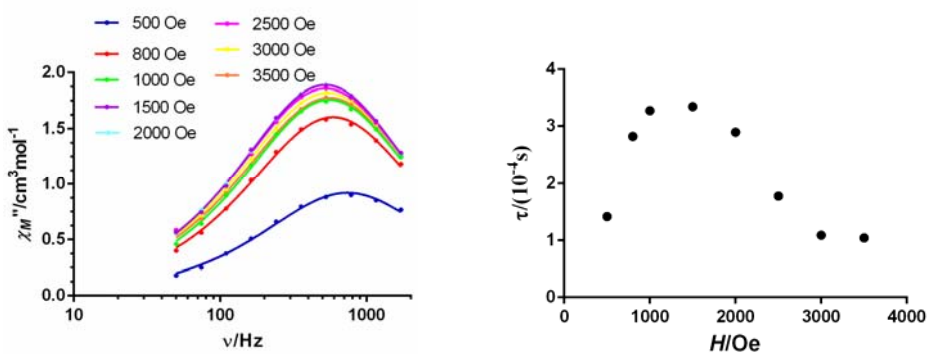

**Figure S4.** Left) Dependence of  $\chi''_M$  on frequency for **1** at 5 K under various external applied fields. Right) Dependence of the magnetic relaxation time on field at 5 K for **1**.

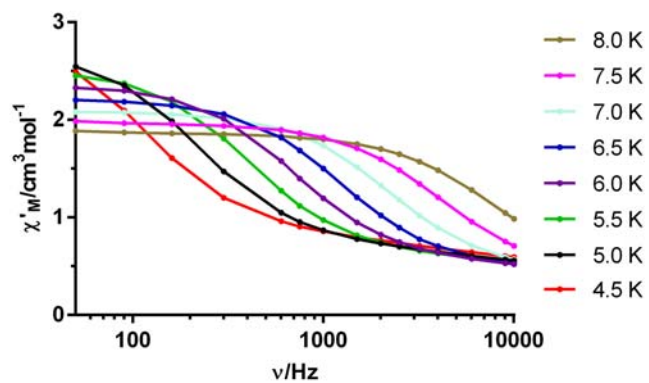

Figure S5. Dependence of  $\chi''_M$  on frequency for **1** under  $H_{dc} = 1500$  Oe between 4.5 and 8 K.

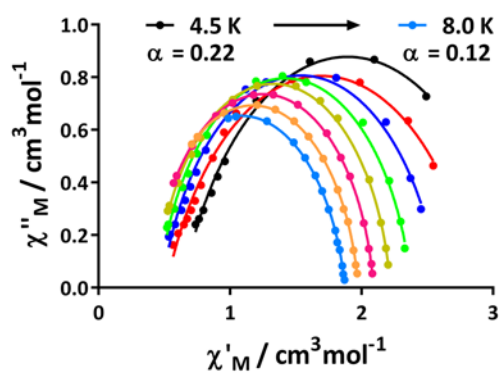

Figure S6. Cole-Cole plot for complex **1** under an external field  $H_{dc} = 1500$  Oe.
